# Supplementary material for: A dedicated robust instrument for water vapor generation at low humidity for use with a laser waterisotope analyzer in cold and dry polar regions.
Source: Copernicus journal article supplement (doi:10.5194/amt-2020-345), 2020-10-05
Supplement: Supplementary file [file amt-2020-345-RC2-supplement.pdf]

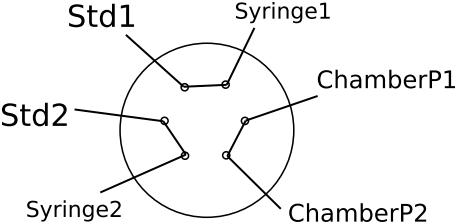

Position 1  
filling syringes
